# Supplementary material for: Access, demand, and utilization of childhood immunization services: A cross-sectional household survey in Western Area Urban district, Sierra Leone, 2019
Source: PubMed Central journal article supplement (PMC7243070; doi:10.7189/jogh.10.010420), 2020-06
Supplement: jogh-10-010420-s001.pdf [file jogh-10-010420-s001.pdf]

## Supplementary Materials

### **Appendix S1. Household enumeration and survey sampling methodology:**

The household line listing was created during October-December 2018 through enumeration of all structures in each selected EA with information documented on the number of structures, presence and the number of households within each structure, the number of household members, age and sex of each member. Three attempts were made to enumerate each household. Listing completion in each EA was determined using a threshold of 80%.

A sample size of 400 (200 households in slums and 200 households in non-slums) was determined to be sufficient to capture an expected prevalence of 10% of enrolled children who are not up-to-date on the recommended childhood vaccines in each setting, with a precision of 7% when sampling 29 enumeration areas. A non-response rate of 15% and a design effect of 1.6 was assumed.

Table S1. Household level demographic and socioeconomic characteristics (unweighted), household survey, WAU district, Sierra Leone, 2019

| Household level characteristics                                                                            | Slum (n=236)  |              | Non-slum (n=207) |              |
|------------------------------------------------------------------------------------------------------------|---------------|--------------|------------------|--------------|
|                                                                                                            | n or (median) | [Range] or % | n or (median)    | [Range] or % |
| <b>Main source of drinking water</b>                                                                       |               |              |                  |              |
| Piped water                                                                                                | 178           | 75           | 107              | 52           |
| Dug well                                                                                                   | 17            | 7            | 46               | 22           |
| Water from spring                                                                                          | 1             | <1           | 6                | 3            |
| Surface water (river/dam)                                                                                  | 0             | 0            | 5                | 2            |
| Water tank                                                                                                 | 3             | 1            | 1                | <1           |
| Purchase filtered water                                                                                    | 38            | 16           | 42               | 20           |
| <b>Location of water source</b>                                                                            |               |              |                  |              |
| In home                                                                                                    | 11            | 6            | 14               | 8            |
| In own yard/plot                                                                                           | 44            | 22           | 29               | 18           |
| Elsewhere                                                                                                  | 143           | 72           | 122              | 74           |
| <b>Median time to reach water source (minutes)</b>                                                         | (15)          | [1-180]      | 30               | [1-360]      |
| <b>Type of toilet</b>                                                                                      |               |              |                  |              |
| Flush or pour flush toilet                                                                                 | 74            | 31           | 74               | 36           |
| Pit latrine                                                                                                | 106           | 45           | 123              | 59           |
| Bucket/ hanging toilet/ plastic bags                                                                       | 56            | 24           | 10               | 5            |
| <b>HHs possessing all of the following: electricity, radio, television, mobile phone, and refrigerator</b> | 69            | 29           | 88               | 43           |
| <b>HHs possessing all of the following: rudimentary or finished walls, floors, and roof</b>                | 213           | 89           | 207              | 94           |

Table S2. Caregiver factors and attitudes associated with utilization of routine immunization comparing slum to non-slum areas (weighted), household survey, Western Area Urban district, Sierra Leone, 2019

|                                                                                                             | <b>Slum (n=232*)</b> |        | <b>Non-slum (n=210)</b> |        |
|-------------------------------------------------------------------------------------------------------------|----------------------|--------|-------------------------|--------|
|                                                                                                             | %                    | 95% CI | %                       | 95% CI |
| <b>Transportation time from home to vaccination site</b>                                                    |                      |        |                         |        |
| <30 minutes                                                                                                 | 53                   | 45-62  | 58                      | 45-69  |
| 30 minutes – 1 hour                                                                                         | 38                   | 30-46  | 32                      | 24-42  |
| >1 hour                                                                                                     | 8                    | 4-14   | 9                       | 5-15   |
| <b>Perception of time to reach usual vaccination site</b>                                                   |                      |        |                         |        |
| About right                                                                                                 | 25                   | 19-31  | 24                      | 17-32  |
| A short time                                                                                                | 41                   | 33-40  | 36                      | 26-47  |
| Too much time                                                                                               | 34                   | 24-45  | 40                      | 32-50  |
| <b>Preferred location of additional vaccination site</b>                                                    |                      |        |                         |        |
| Close to home                                                                                               | 88                   | 82-92  | 90                      | 83-94  |
| Close to work                                                                                               | 2                    | 1-5    | 1                       | 0-2    |
| Close to market                                                                                             | 7                    | 4-12   | 5                       | 3-9    |
| No preference                                                                                               | 3                    | 1-9    | 5                       | 2-9    |
| <b>Wait time at vaccination site</b>                                                                        |                      |        |                         |        |
| <30 minutes                                                                                                 | 21                   | 17-25  | 20                      | 14-29  |
| 30 minutes – 1 hour                                                                                         | 39                   | 32-47  | 35                      | 26-44  |
| >1 hour                                                                                                     | 40                   | 32-47  | 44                      | 37-52  |
| <b>Perception of wait time at vaccination site</b>                                                          |                      |        |                         |        |
| About right                                                                                                 | 49                   | 39-58  | 43                      | 35-51  |
| A short time                                                                                                | 37                   | 26-40  | 35                      | 27-45  |
| Too much time                                                                                               | 14                   | 10-19  | 22                      | 16-29  |
| <b>Payment to healthcare worker</b>                                                                         |                      |        |                         |        |
| Nothing                                                                                                     | 47                   | 36-58  | 50                      | 41-58  |
| 1,000-5,000 Leones                                                                                          | 41                   | 32-52  | 38                      | 28-49  |
| 6,000-10,000 Leones                                                                                         | 8                    | 5-13   | 9                       | 6-14   |
| >10,000 Leones                                                                                              | 4                    | 1-8    | 3                       | 1-7    |
| <b>Knowledge of child in family or community who experienced vaccine side effects within last 12 months</b> | 7                    | 4-13   | 7                       | 4-13   |
| <b>Self-reported refusal of recommended vaccination</b>                                                     | 6                    | 3-12   | 2                       | 1-5    |
| <b>Self-reported delays in receiving recommended vaccination</b>                                            | 36                   | 26-46  | 37                      | 28-48  |
| <b>Would vaccinate future child with all recommended vaccines</b>                                           | 99                   | 97-100 | 99                      | 95-100 |
| <b>Attended vaccination site but child did not receive vaccination</b>                                      | 13                   | 8-18   | 10                      | 6-15   |
| <b>Reason for attending but not receiving</b>                                                               | <b>N=28</b>          |        | <b>N=23</b>             |        |
| Not enough children to open a vaccination vial                                                              | 26                   | 14-43  | 48                      | 25-72  |
| Vaccines not available                                                                                      | 25                   | 12-44  | 6                       | 1-22   |
| Not a scheduled vaccination day                                                                             | 34                   | 15-59  | 29                      | 10-61  |
| Other                                                                                                       | 15                   | 6-33   | 17                      | 5-45   |
| Wait time was too long, chose not to go through with vaccination or asked to pay or tip for service         | 0                    | -      | 0                       | -      |

\*Missing data from two caregivers

Note: No significant differences at p<0.05 level.

Table S2. Caregiver reason for refusal or delay of recommended vaccination (unweighted), household survey, WAU district, Sierra Leone, 2019

| <b>Reason for self-reported refusal*</b>                                                                                        | <b>Slum (n=13)<br/>n (%)</b> | <b>Non slum (n=4)<br/>n (%)</b> |
|---------------------------------------------------------------------------------------------------------------------------------|------------------------------|---------------------------------|
| Fear of vaccination side effects                                                                                                | 9 (69)                       | 1 (25)                          |
| Lack of trust in vaccinator                                                                                                     | 2 (15)                       | 1 (25)                          |
| No particular reason                                                                                                            | 1 (8)                        | 1 (25)                          |
| Lack of trust in vaccine                                                                                                        | 1 (8)                        | 0 (0)                           |
| Fertility concerns                                                                                                              | 0 (0)                        | 1 (25)                          |
| Child or caregiver was ill                                                                                                      | 1 (8)                        | 0 (0)                           |
| Other (e.g., fear of hurting child during vaccination)                                                                          | 1 (8)                        | 0 (0)                           |
| Lack of trust in health system, too many vaccinations in one visit, lack of benefit to vaccine, concerns about cost or religion | 0 (0)                        | 0 (0)                           |
|                                                                                                                                 |                              |                                 |
| <b>Reason for self-reported delay*</b>                                                                                          | <b>Slum (n=83)</b>           | <b>Non slum (n=80)</b>          |
| Lack of time to take child                                                                                                      | 35 (42)                      | 40 (50)                         |
| Child or caregiver was sick                                                                                                     | 16 (19)                      | 12 (15)                         |
| Fear of vaccination side effects                                                                                                | 11 (13)                      | 5 (6)                           |
| Other (e.g., inclement weather or holiday)                                                                                      | 6 (8)                        | 9 (11)                          |
| Forgot about vaccination                                                                                                        | 8 (10)                       | 5 (6)                           |
| No particular reason                                                                                                            | 5 (6)                        | 4 (5)                           |
| Long distance to get to vaccination site                                                                                        | 2 (2)                        | 4 (5)                           |
| Lack of funds to pay the tip/token of appreciation                                                                              | 3 (4)                        | 1 (1)                           |
| Long waiting time at vaccination site                                                                                           | 2 (2)                        | 1 (1)                           |
| Negative experiences with healthcare providers                                                                                  | 2 (2)                        | 1 (1)                           |
| Lack of trust in vaccinator                                                                                                     | 2 (2)                        | 1 (1)                           |
| Administering too many vaccines during the same visit                                                                           | 0 (0)                        | 2 (3)                           |
| Lack of funds to pay for transportation                                                                                         | 2 (2)                        | 0 (0)                           |
| Lack of trust in vaccine                                                                                                        | 1 (1)                        | 0 (0)                           |
| Misplaced vaccination card                                                                                                      | 1 (1)                        | 4 (5)                           |
| Lack of benefit to vaccinate, lack of trust in health system, religious or fertility concerns                                   | 0 (0)                        | 0 (0)                           |

\*Categories are not mutually exclusive

Table S4. Caregiver perceptions related to childhood vaccinations comparing slum to non-slum areas and receiving three doses of pentavalent vaccine among children who had a vaccination card at the time of interview (weighted), household survey, Western Area Urban district, Sierra Leone, 2019

| Perceptions of vaccination (% very much)*                            | Slum<br>N=233** | Non-slum<br>N=210 | P-<br>value | Received<br>three<br>pentavalent<br>vaccine<br>doses<br>N=309 | Did not<br>received<br>three<br>pentavalent<br>vaccine doses<br>N=41 | P-<br>value      |
|----------------------------------------------------------------------|-----------------|-------------------|-------------|---------------------------------------------------------------|----------------------------------------------------------------------|------------------|
| Vaccines are good for your child                                     | 98 (95-99)      | 100 (98-100)      | <b>0.04</b> | 99 (98-100)                                                   | 100                                                                  | 0.69             |
| Vaccines are safe for your child                                     | 91 (86-94)      | 90 (83-94)        | 0.86        | 90 (85-94)                                                    | 64 (21-92)                                                           | 0.08             |
| Vaccines protect your child against diseases                         | 95 (81-97)      | 99 (96-100)       | <b>0.04</b> | 98 (95-99)                                                    | 100 (96-100)                                                         | 0.14             |
| Confident in your ability to take your child for vaccination visit   | 88 (82-93)      | 92 (84-96)        | 0.38        | 94 (89-97)                                                    | 64 (21-93)                                                           | <b>0.02</b>      |
| Encourage others to get their children vaccinated                    | 67 (61-73)      | 73 (64-81)        | 0.25        | 71 (62-79)                                                    | 44 (16-77)                                                           | 0.09             |
| People in your community value childhood vaccination services        | 74 (66-81)      | 82 (73-88)        | 0.15        | 78 (69-86)                                                    | 47 (17-79)                                                           | <b>0.03</b>      |
| Your spouse, partner or other family member approves of vaccinations | 88 (83-92)      | 94 (88-97)        | 0.07        | 95 (91-98)                                                    | 53 (19-84)                                                           | <b>&lt;0.001</b> |
| Other parents in your community approve of childhood vaccinations    | 69 (61-76)      | 77 (68-84)        | 0.17        | 76 (67-83)                                                    | 53 (31-74)                                                           | <b>0.01</b>      |
| Trusted leaders in your community approve of childhood vaccinations  | 75 (68-81)      | 74 (65-82)        | 0.84        | 75 (67-82)                                                    | 68 (49-82)                                                           | 0.31             |
| Measles is a health threat for children who are unvaccinated         | 92 (88-95)      | 94 (88-97)        | 0.50        | 94 (86-98)                                                    | 94 (80-98)                                                           | 0.85             |
| Illnesses prevented by vaccinations are severe                       | 90 (86-94)      | 95 (90-97)        | 0.06        | 94 (90-97)                                                    | 95 (85-98)                                                           | 0.88             |

\*Comparison is between the “very much” response option and “somewhat”, “very little”, and “not at all” combined.

\*\*Missing data from one caregiver

Table S5 . Vaccination coverage of children ages 12-23 months and characteristics (weighted), household survey, Western Area Urban district, Sierra Leone, 2019

| Vaccination coverage                                                        | 12-23 months old<br>(N=209) |        |
|-----------------------------------------------------------------------------|-----------------------------|--------|
|                                                                             | % or (mean)                 | 95% CI |
| Mean age of most recent vaccination in months                               | 11                          | 11-12  |
| Owns vaccination card                                                       |                             |        |
| Yes, available                                                              | 82                          | 75-87  |
| Yes, not seen                                                               | 11                          | 7-18   |
| No                                                                          | 7                           | 3-15   |
| <b>Vaccination coverage (by card or caregiver recall)</b>                   |                             |        |
| BCG vaccination                                                             | 100                         | 100    |
| Penta1                                                                      | 100                         | 100    |
| Received two doses of penta                                                 | 100                         | 100    |
| Received all three penta doses                                              | 100                         | 100    |
| MCV1                                                                        | 82                          | 73-89  |
| MCV2 <sup>‡</sup>                                                           | 30                          | 21-39  |
| Received BCG, all penta doses and 2 measles doses <sup>‡</sup>              | 23                          | 15-33  |
| Received BCG, all penta doses and 2 measles doses by 24 months <sup>‡</sup> | 19                          | 14-27  |
| No vaccinations                                                             | 0                           | 0      |

Abbreviations: BCG = Bacillus Calmette-Guérin; Penta = pentavalent vaccine (diphtheria-tetanus-pertussis-hepatitis B-*Haemophilus influenzae* type b); MCV1 = measles-containing vaccine, 1<sup>st</sup> dose; MCV2 = measles-containing vaccine, 2<sup>nd</sup> dose

<sup>‡</sup>Only children  $\geq 15$  months were included in the analysis, n=168

## Appendix S2. Household Survey Questionnaire – Urban Needs Assessment

|                                                 |                                                                                                  |
|-------------------------------------------------|--------------------------------------------------------------------------------------------------|
| <b>Date</b>                                     | _ _ _ _  /  _ _ _ _  /  _ _ _ _  (dd/mm/yy)                                                      |
| <b>Team ID</b>                                  |                                                                                                  |
| <b>Enumerator ID</b>                            |                                                                                                  |
| <b>Enumeration area / Cluster</b>               |                                                                                                  |
| <b>Household ID</b>                             |                                                                                                  |
| <b>Infant ID</b>                                |                                                                                                  |
| <b>Ward</b>                                     | 1. West I<br>2. West II<br>3. West III<br>4. Central I<br>5. East I<br>6. East II<br>7. East III |
| <b>Number of visits made</b>                    | 1. One      Date of visit: _____<br>2. Two      Date of visit: _____                             |
| <b>Can data be collected for the household?</b> | <input type="checkbox"/> 1. Yes<br><input type="checkbox"/> 2. No                                |

| 1. Outcome of visit                          | Visit 1 | Visit 2 |
|----------------------------------------------|---------|---------|
| Completed                                    | 1       | 1       |
| No HH member at home/no competent respondent | 2       | 2       |
| Entire HH absent for extended period         | 3       | 3       |
| Postponed                                    | 4       | 4       |
| Refused to be interviewed                    | 5       | 5       |
| Dwelling vacant/address not a dwelling       | 6       | 6       |

|                                      |    |    |
|--------------------------------------|----|----|
| Dwelling destroyed                   | 7  | 7  |
| Dwelling not found                   | 8  | 8  |
| Deaf/Did not speak a survey language | 9  | 9  |
| No eligible respondents in household | 10 | 10 |
| Interview partially completed        | 11 | 11 |
| Entire HH moved out of EA            | 12 | 12 |
| Eligible caregiver moved out of EA   | 13 | 13 |
| Eligible infant moved out of EA      | 14 | 14 |
| Other (specify)_____                 | 15 | 15 |

START\_TIME (for tablet)

| 100  | Eligibility and Consent                                                                                                                                                                                                                                                                                                         |                                                                 |                                                                                                                                                                                                                                            |
|------|---------------------------------------------------------------------------------------------------------------------------------------------------------------------------------------------------------------------------------------------------------------------------------------------------------------------------------|-----------------------------------------------------------------|--------------------------------------------------------------------------------------------------------------------------------------------------------------------------------------------------------------------------------------------|
| ID   | QUESTION                                                                                                                                                                                                                                                                                                                        | RESPONSE                                                        | NOTES / SKIP PATTERN                                                                                                                                                                                                                       |
| 101. | <p>How many children 12-36 months of age live in this household <b>for which you are the primary caregiver?</b></p> <p><i>ONLY enter number of children for which the respondent is the primary caregiver.</i></p> <p><i>(armos pikin dem wae dae between 12 to 36 month dae na dis pot wae na u dae take care of dem?)</i></p> | <p> __   __ </p> <p>Enter 99 if don't know</p>                  | <p>This question is just to confirm that there are indeed eligible children in the household based on the listing</p> <p>If 0 then tablet will show a message to stop and talk to supervisor</p> <p>Limit total to 5 eligible children</p> |
| 102. | <p>Write the name of each child age 12-36 months of age in the box to the right.</p>                                                                                                                                                                                                                                            | <p>1. Name:</p> <p>2. Name:</p> <p>3. Name:</p> <p>4. Name:</p> |                                                                                                                                                                                                                                            |



### Informed Consent Statement

Thank you for your time. We are here today representing Sierra Leone Ministry of Health and its partners. We would like to ask you about your experience with immunizations that your child aged 12-36 months has received. The information provided will help the Ministry in improving the country's immunization programme. The information we collect will be anonymous, which means that you and your child/children will not be personally identified with the information. The interview should take 30-45 minutes to conduct. Participation in the survey is voluntary, but I hope you will agree to answer the questions since your views are important.

|      |                                                                                    |                                                                       |                                                                              |
|------|------------------------------------------------------------------------------------|-----------------------------------------------------------------------|------------------------------------------------------------------------------|
| 103. | Do you consent to participate in the interview?<br><i>(u gree for leh we tok?)</i> | <input type="checkbox"/> 1. Yes<br><br><input type="checkbox"/> 2. No | If NO, thank the person for his/her time and continue to the next household. |
|------|------------------------------------------------------------------------------------|-----------------------------------------------------------------------|------------------------------------------------------------------------------|

*Complete these questions for ALL children between 12 and 36 months old for which this respondent is the primary caregiver*

|      |                                                                                      |                                                                       |                                                                                                                                       |
|------|--------------------------------------------------------------------------------------|-----------------------------------------------------------------------|---------------------------------------------------------------------------------------------------------------------------------------|
| 104. | Is the respondent 15 years of age or older?<br><i>(u don 15 year or u don pass?)</i> | <input type="checkbox"/> 1. Yes<br><br><input type="checkbox"/> 2. No | If NO, thank the respondent for their time and schedule a revisit when an adult will be available and continue to the next household. |
|------|--------------------------------------------------------------------------------------|-----------------------------------------------------------------------|---------------------------------------------------------------------------------------------------------------------------------------|

|      |                                                                                                                |                                                                              |                                                                                                                                                |
|------|----------------------------------------------------------------------------------------------------------------|------------------------------------------------------------------------------|------------------------------------------------------------------------------------------------------------------------------------------------|
| 105. | Are you the primary caregiver of this child?<br><i>(Na u na d main porsin wae dae take care of dis pikin?)</i> | <input type="checkbox"/> 1. Yes<br><br><input type="checkbox"/> 2. No -----> | If NO, thank the respondent for their time and schedule a revisit when primary caregiver will be available and continue to the next household. |
|------|----------------------------------------------------------------------------------------------------------------|------------------------------------------------------------------------------|------------------------------------------------------------------------------------------------------------------------------------------------|

|      |                                                         |                                                                                                                                                                                                                                        |                                                                                                                |
|------|---------------------------------------------------------|----------------------------------------------------------------------------------------------------------------------------------------------------------------------------------------------------------------------------------------|----------------------------------------------------------------------------------------------------------------|
| 106. | Date of birth of (NAME)<br><i>(wus tem (NAME) bon?)</i> | Day (DD)  __   __ <br><br>Month (MM)  __   __ <br><br><i>99 = don't know</i><br><br>Year<br><br><input type="checkbox"/> 2016<br><input type="checkbox"/> 2017<br><input type="checkbox"/> 2018<br><input type="checkbox"/> Don't know | If there are no other eligible children in household, thank the respondent and continue to the next household. |
|------|---------------------------------------------------------|----------------------------------------------------------------------------------------------------------------------------------------------------------------------------------------------------------------------------------------|----------------------------------------------------------------------------------------------------------------|

| <b>Family and Child Demographic Characteristics</b><br><br>I would now like to ask you a few questions about your home.<br><br>NB: Ask child's name and substitute "this child" with the name of the child in this section. |                                                                                                                                                                                                                                                                                   |          |       |
|-----------------------------------------------------------------------------------------------------------------------------------------------------------------------------------------------------------------------------|-----------------------------------------------------------------------------------------------------------------------------------------------------------------------------------------------------------------------------------------------------------------------------------|----------|-------|
| ID                                                                                                                                                                                                                          | QUESTION                                                                                                                                                                                                                                                                          | RESPONSE | GO TO |
| 201.                                                                                                                                                                                                                        | How many people live in this household as primary residents?<br><br><i>(armos people dem gbain dae live na dis hos wae na wuna all dae eat na d same pot?)</i><br><br><i>(defined as those who regularly sleep in the household and live there the majority of the past year)</i> | __   __  |       |

|      |                                                                                                                                                                                                                                                           |                                                                                                                                                                                                                                           |            |
|------|-----------------------------------------------------------------------------------------------------------------------------------------------------------------------------------------------------------------------------------------------------------|-------------------------------------------------------------------------------------------------------------------------------------------------------------------------------------------------------------------------------------------|------------|
| 202. | What is your relationship to (NAME)?<br><i>(U Na watin to (NAME)?)</i>                                                                                                                                                                                    | <input type="checkbox"/> 1. Mother<br><input type="checkbox"/> 2. Father<br><input type="checkbox"/> 3. Grandmother<br><input type="checkbox"/> 4. Grandfather<br><input type="checkbox"/> 5. Other guardian / caregiver<br>Specify _____ | 1 →<br>204 |
| 203. | Is the mother of (NAME) still living?<br><i>((NAME) ein Mama dae alive?)</i>                                                                                                                                                                              | <input type="checkbox"/> 1. Yes<br><input type="checkbox"/> 2. No                                                                                                                                                                         |            |
| 204. | How many children did (NAME)'s mother give birth to altogether, including those who died (if any) after birth and those who are no longer living with you?<br><i>(Armos pikin dem (NAME) ein mama don born, weda e don die or e nor dae witam na ya?)</i> | __   __  children<br><i>If don't know, enter 99</i>                                                                                                                                                                                       |            |
| 205. | How many living children does (NAME)'s mother have in total?<br><i>(armos pa den wanya dae alive?)</i>                                                                                                                                                    | __   __  children<br><i>If don't know, enter 99</i>                                                                                                                                                                                       |            |
| 206. | Starting from the oldest child, what birth order is (NAME), including those who have died or are no longer living with you?<br><i>(starting from d fors pikin(NAME) na de number armos pikin wae e bon?)</i>                                              | __   __  rank                                                                                                                                                                                                                             |            |
| 207. | What is (NAME)'s sex?<br><i>((NAME) Na man or woman?)</i>                                                                                                                                                                                                 | <input type="checkbox"/> 1. Female<br><input type="checkbox"/> 2. Male                                                                                                                                                                    |            |

|      |                                                                                                                                                                                                                                             |                                                                                                                                                                                                                                                           |                                                      |
|------|---------------------------------------------------------------------------------------------------------------------------------------------------------------------------------------------------------------------------------------------|-----------------------------------------------------------------------------------------------------------------------------------------------------------------------------------------------------------------------------------------------------------|------------------------------------------------------|
| 208. | <p>Where was (NAME) born?<br/><i>(Wusai den bon (NAME)?)</i></p>                                                                                                                                                                            | <input type="checkbox"/> 1. Home<br><input type="checkbox"/> 2. Health facility (any type)<br><input type="checkbox"/> 3. Traditional birth attendant (TBA) site<br><input type="checkbox"/> 4. Other, specify<br><input type="checkbox"/> 99. Don't know |                                                      |
| 209. | <p>How long have you lived in this neighborhood?<br/><i>(aw long u don tap na dis area?)</i></p> <p><i>If less than 1 year, please include number of months. If more than 1 year, round to the nearest year and put "0" for months.</i></p> | <p> __   __  years</p> <p><b>or if less than 1 year:</b></p> <p> __   __  months</p> <p><i>99 if don't know</i></p>                                                                                                                                       | <p>IF<br/>Q203<br/>= NO,<br/>SKIP<br/>TO<br/>215</p> |
| 210. | <p>What is (NAME)'s mother's marital status?<br/><i>((NAME) e mama marade?)</i></p>                                                                                                                                                         | <input type="checkbox"/> 1. Married<br><input type="checkbox"/> 2. Living together<br><input type="checkbox"/> 3. Divorced or separated<br><input type="checkbox"/> 3. Widowed<br><input type="checkbox"/> 4. Never married and never lived together      |                                                      |
| 211. | <p>What is (NAME)'s mother's age?<br/><i>(Armos year (NAME) e mama old?)</i></p>                                                                                                                                                            | <p> __   __  Years</p> <p><i>99 if don't know</i></p>                                                                                                                                                                                                     |                                                      |

|      |                                                                                                                                               |                                                                                                                                                                                                                                                                                                                                                                                                                                                                                                                                                                                                                                                                                                                                                                                                                                                                                                                          |      |
|------|-----------------------------------------------------------------------------------------------------------------------------------------------|--------------------------------------------------------------------------------------------------------------------------------------------------------------------------------------------------------------------------------------------------------------------------------------------------------------------------------------------------------------------------------------------------------------------------------------------------------------------------------------------------------------------------------------------------------------------------------------------------------------------------------------------------------------------------------------------------------------------------------------------------------------------------------------------------------------------------------------------------------------------------------------------------------------------------|------|
| 212. | <p>What is (NAME)'s mother's highest level of school completed?</p> <p><i>(wusai (NAME) e Mama tap pa book learning?)</i></p>                 | <input type="checkbox"/> 1. Never attended school/no formal education<br><input type="checkbox"/> 2. Attended some primary school<br><input type="checkbox"/> 3. Primary<br><input type="checkbox"/> 4. Junior secondary<br><input type="checkbox"/> 5. Senior secondary<br><input type="checkbox"/> 6. Vocational / tertiary<br><input type="checkbox"/> 7. Higher<br><input type="checkbox"/> 88. Don't Know                                                                                                                                                                                                                                                                                                                                                                                                                                                                                                           |      |
| 213. | <p>What is (NAME)'s mother's religion?</p> <p><i>(Watin na (NAME) e mama religion?)</i></p>                                                   | <input type="checkbox"/> 1. Christian<br><input type="checkbox"/> 2. Muslim<br><input type="checkbox"/> 3. Traditionalist<br><input type="checkbox"/> 4. None<br><input type="checkbox"/> 5. Other (specify)<br><input type="checkbox"/> 88. Don't Know                                                                                                                                                                                                                                                                                                                                                                                                                                                                                                                                                                                                                                                                  |      |
| 214. | <p>What does (NAME)'s mother do as her primary way to earn money?</p> <p><i>(Watin na de main tin (NAME) e mama dae do for get moni?)</i></p> | <input type="checkbox"/> 1. Petty trader<br><input type="checkbox"/> 2. Laborer:<br>Plumber/Carpenter/Electrician/Mechanic/Contractor/Fisher man<br><input type="checkbox"/> 3. Private business ( <b>except</b> petty traders)<br><input type="checkbox"/> 4. Farmer<br><input type="checkbox"/> 5. Teacher/lecturer/Instructor<br><input type="checkbox"/> 6. Public transportation driver (taxi, buses, podapoda)<br><input type="checkbox"/> 7. Okada/ Keke driver<br><input type="checkbox"/> 8. Medical or health professional<br><input type="checkbox"/> 9. Soldier<br><input type="checkbox"/> 10. Other government employee ( <b>except</b> soldier)<br><input type="checkbox"/> 11. NGO<br><input type="checkbox"/> 12. Student<br><input type="checkbox"/> 13. Unemployed<br><input type="checkbox"/> 14. Retired<br><input type="checkbox"/> 15. Other (specify)<br><input type="checkbox"/> 88. Don't Know |      |
| 215. | <p>Is the father of (NAME) still living?</p> <p><i>((NAME) e papa dae alive?)</i></p>                                                         | <input type="checkbox"/> 1. Yes<br><input type="checkbox"/> 2. No----->                                                                                                                                                                                                                                                                                                                                                                                                                                                                                                                                                                                                                                                                                                                                                                                                                                                  | Q219 |

|      |                                                                                                                                                |                                                                                                                                                                                                                                                                                                                                                                                                                                                                                                                                                                                                                                                                                                                                                                                                                                                                                                                          |  |
|------|------------------------------------------------------------------------------------------------------------------------------------------------|--------------------------------------------------------------------------------------------------------------------------------------------------------------------------------------------------------------------------------------------------------------------------------------------------------------------------------------------------------------------------------------------------------------------------------------------------------------------------------------------------------------------------------------------------------------------------------------------------------------------------------------------------------------------------------------------------------------------------------------------------------------------------------------------------------------------------------------------------------------------------------------------------------------------------|--|
| 216. | <p>What is (NAME)'s father's religion?</p> <p><i>(Watin na (NAME) e papa religion?)</i></p>                                                    | <input type="checkbox"/> 1. Christian<br><input type="checkbox"/> 2. Muslim<br><input type="checkbox"/> 3. Traditionalist<br><input type="checkbox"/> 4. None<br><input type="checkbox"/> 5. Other (specify)<br><input type="checkbox"/> 88. Don't Know                                                                                                                                                                                                                                                                                                                                                                                                                                                                                                                                                                                                                                                                  |  |
| 217. | <p>What is (NAME)'s father's highest level of school completed?</p> <p><i>(wusai (NAME) e Papa tap pa book learning?)</i></p>                  | <input type="checkbox"/> 1. Never attended school/no formal education<br><input type="checkbox"/> 2. Attended some primary school<br><input type="checkbox"/> 3. Primary<br><input type="checkbox"/> 4. Junior secondary<br><input type="checkbox"/> 5. Senior secondary<br><input type="checkbox"/> 6. Vocational / tertiary<br><input type="checkbox"/> 7. Higher<br><input type="checkbox"/> 88. Don't know                                                                                                                                                                                                                                                                                                                                                                                                                                                                                                           |  |
| 218. | <p>What does (NAME)'s father do as his primary way to earn money?</p> <p><i>(Watin na de main tin (NAME) e papa, dae do for get moni?)</i></p> | <input type="checkbox"/> 1. Petty trader<br><input type="checkbox"/> 2. Laborer:<br>Plumber/Carpenter/Electrician/Mechanic/Contractor/Fisher man<br><input type="checkbox"/> 3. Private business ( <b>except</b> petty traders)<br><input type="checkbox"/> 4. Farmer<br><input type="checkbox"/> 5. Teacher/lecturer/Instructor<br><input type="checkbox"/> 6. Public transportation driver (taxi, buses, podapoda)<br><input type="checkbox"/> 7. Okada/ Keke driver<br><input type="checkbox"/> 8. Medical or health professional<br><input type="checkbox"/> 9. Soldier<br><input type="checkbox"/> 10. Other government employee ( <b>except</b> soldier)<br><input type="checkbox"/> 11. NGO<br><input type="checkbox"/> 12. Student<br><input type="checkbox"/> 13. Unemployed<br><input type="checkbox"/> 14. Retired<br><input type="checkbox"/> 15. Other (specify)<br><input type="checkbox"/> 88. Don't Know |  |

|      |                                                                                                                                                                                                                                                                    |                                                                                                                                                                                                                                                                                                                                                                        |                            |
|------|--------------------------------------------------------------------------------------------------------------------------------------------------------------------------------------------------------------------------------------------------------------------|------------------------------------------------------------------------------------------------------------------------------------------------------------------------------------------------------------------------------------------------------------------------------------------------------------------------------------------------------------------------|----------------------------|
| 219. | Who holds primary responsibility for household chores such as cooking, cleaning, taking care of family members?<br><br><i>(Wudat na d main porsin wae dae take care of d hos woke dem lek for cook, clean en take care of de fambul dem?)</i>                      | <input type="checkbox"/> 1. Mother of child<br><input type="checkbox"/> 2. Father of child<br><input type="checkbox"/> 3. Child's grandparent<br><input type="checkbox"/> 4. Both mother and father of child<br><input type="checkbox"/> 5. Mother and another family member<br><input type="checkbox"/> 6. Other relatives<br><input type="checkbox"/> 7. Other _____ |                            |
| 220. | Does someone besides you (neighbor, relative, nanny, etc.) look after/take care of (NAME) for several hours at a time?<br><br><i>(Any bodi apart from u lek u neaba or u orda fambul dem or u nanny kin take care of (NAME) for boku hours any tem e hol lam?)</i> | <input type="checkbox"/> 1. Yes<br><input type="checkbox"/> 2. No                                                                                                                                                                                                                                                                                                      | 1→2<br>21<br><br>2→3<br>01 |
| 221. | How often does someone besides you look after (NAME) for several hours at a time?<br><br><i>(Armos tem dis porsin apart from u kin take care of (NAME) for boku hours any tem e hol lam?)</i>                                                                      | <input type="checkbox"/> 1. Daily<br><input type="checkbox"/> 2. Weekly<br><input type="checkbox"/> 3. Monthly<br><input type="checkbox"/> 4. Less than once a month                                                                                                                                                                                                   |                            |

| 300 Child's Vaccination History |                                                                                                                                                                                                                                                          |                                                                                                                                                             |       |
|---------------------------------|----------------------------------------------------------------------------------------------------------------------------------------------------------------------------------------------------------------------------------------------------------|-------------------------------------------------------------------------------------------------------------------------------------------------------------|-------|
| ID                              | QUESTION                                                                                                                                                                                                                                                 | RESPONSE                                                                                                                                                    | GO TO |
| 301                             | How old was {NAME} in months at their most recent vaccination visit?<br><br><i>(armos month(NAME) bin ol wae e take d last marklate?)</i><br><br><i>Provide the age in months based on caregiver recall. Do not abstract from the immunization card.</i> | <input type="checkbox"/> <input type="checkbox"/> months<br><br><input type="checkbox"/> Don't know<br><br><input type="checkbox"/> Never vaccinated -----→ | Q303  |

|     |                                                                                                                                                                                                                                                                                                                                                                        |                                                                                                                           |                     |
|-----|------------------------------------------------------------------------------------------------------------------------------------------------------------------------------------------------------------------------------------------------------------------------------------------------------------------------------------------------------------------------|---------------------------------------------------------------------------------------------------------------------------|---------------------|
| 302 | <p>As far as you know, has your child received all of the recommended immunizations up to the current age of the child?</p> <p><i>(as far as u no for dis pikin e age, e don take all d marklate wae e suppose for don take ?)</i></p> <p><i>Provide the answer based on caregiver recall. Do not abstract from the immunization card.</i></p>                         | <input type="checkbox"/> 1. Yes<br><input type="checkbox"/> 2. No<br><input type="checkbox"/> 88. Don't know              |                     |
| 303 | <p>Do you have an immunization card [under 5 card] or a card where (NAME)'s vaccinations are written down?</p> <p><i>(u get marklate card (da yellow wan) or sie wusai den mak all de marklate(NAME) don take?)</i></p> <p><i>If YES, May I see it please? Have the respondent get the immunization card, if available.</i></p> <p><i>( If Yes, ar kin see am)</i></p> | <input type="checkbox"/> 1. Yes, seen<br><input type="checkbox"/> 2. Yes, not seen<br><input type="checkbox"/> 3. No card | 1 → 306,<br>3 → 304 |



|     |                                                                                                                                                                                                                                                                                                                                                                                |                                                                                                                                                                                                                                                                                                                                                                                                                         |                                                               |
|-----|--------------------------------------------------------------------------------------------------------------------------------------------------------------------------------------------------------------------------------------------------------------------------------------------------------------------------------------------------------------------------------|-------------------------------------------------------------------------------------------------------------------------------------------------------------------------------------------------------------------------------------------------------------------------------------------------------------------------------------------------------------------------------------------------------------------------|---------------------------------------------------------------|
| 304 | <p>Why do you not have an immunization card [yellow card] or other documentation of immunization history for (NAME) today?</p> <p><i>(watin mek tiday u nor get marklate card, da yellow wan or orda sie wusai den write all d pikin e marklate dem wae (NAME) don take?)</i></p> <p><u>Do not read responses</u></p> <p><i>Ask for the main reason and mark ONLY ONE.</i></p> | <input type="checkbox"/> 1. Child never received an immunization card<br><input type="checkbox"/> 2. Health facility keeps the immunization card<br><input type="checkbox"/> 3. Immunization card is lost or destroyed<br><input type="checkbox"/> 4. Immunization card is with child/kept at a different location<br><input type="checkbox"/> 5. Other (Specify: _____)<br><br><input type="checkbox"/> 88. Don't know | If no card available, go to Q400. Otherwise continue to Q306. |
|-----|--------------------------------------------------------------------------------------------------------------------------------------------------------------------------------------------------------------------------------------------------------------------------------------------------------------------------------------------------------------------------------|-------------------------------------------------------------------------------------------------------------------------------------------------------------------------------------------------------------------------------------------------------------------------------------------------------------------------------------------------------------------------------------------------------------------------|---------------------------------------------------------------|

Review the health card / immunization card of the infant provided by the mother  
 For each vaccine, check « Yes » if there is a checkmark or a date for the vaccine and « no » if there is nothing written. Copy the dates. Check tick box if there is a poorly written or missing day/month/year.

|     |                                                                                                                                                                                                                                                                                            |                                                                       |                                                                                                                                                                                                |                                                   |                                                                                                     |                                                         |  |
|-----|--------------------------------------------------------------------------------------------------------------------------------------------------------------------------------------------------------------------------------------------------------------------------------------------|-----------------------------------------------------------------------|------------------------------------------------------------------------------------------------------------------------------------------------------------------------------------------------|---------------------------------------------------|-----------------------------------------------------------------------------------------------------|---------------------------------------------------------|--|
| 306 | (NAME)'s date of birth (DOB) recorded on card <input type="checkbox"/> <input type="checkbox"/> / <input type="checkbox"/> <input type="checkbox"/> / <input type="checkbox"/> <input type="checkbox"/> <input type="checkbox"/> <input type="checkbox"/><br>a. DD      b. MM      c. YYYY |                                                                       |                                                                                                                                                                                                |                                                   |                                                                                                     |                                                         |  |
| 307 | Type of card(s)<br><br><i>Mark all available.</i>                                                                                                                                                                                                                                          |                                                                       | <input type="checkbox"/> 1. Child Health Record Book--<br>----→<br><input type="checkbox"/> 2. Under 5 card<br><input type="checkbox"/> 3. Piece of paper/other<br>documentation-----<br>----→ | Q309                                              | Q309                                                                                                |                                                         |  |
| 308 | Does the yellow card have designated space to document IPTi doses (new yellow card)?                                                                                                                                                                                                       |                                                                       | <input type="checkbox"/> 1. Yes<br><input type="checkbox"/> 2. No                                                                                                                              |                                                   |                                                                                                     |                                                         |  |
|     | <b>Vaccine</b>                                                                                                                                                                                                                                                                             | <b>a. Vaccine received</b>                                            | <b>b. Day</b>                                                                                                                                                                                  | <b>c. Month</b>                                   | <b>d. Year</b>                                                                                      | <b>e. Date poorly written or missing day/month/year</b> |  |
| 309 | BCG                                                                                                                                                                                                                                                                                        | <input type="checkbox"/> 1. Yes<br><br><input type="checkbox"/> 2. No | <input type="checkbox"/> <input type="checkbox"/>                                                                                                                                              | <input type="checkbox"/> <input type="checkbox"/> | <input type="checkbox"/> <input type="checkbox"/> <input type="checkbox"/> <input type="checkbox"/> | <input type="checkbox"/>                                |  |

|     |                                 |                                                                                                                       |                                                   |                                                   |                                                                                                     |                          |
|-----|---------------------------------|-----------------------------------------------------------------------------------------------------------------------|---------------------------------------------------|---------------------------------------------------|-----------------------------------------------------------------------------------------------------|--------------------------|
| 310 | Pentavalent (1)<br>DTP/Hib/HepB | <input type="checkbox"/> 1. Yes<br><input type="checkbox"/> 2. No                                                     | <input type="checkbox"/> <input type="checkbox"/> | <input type="checkbox"/> <input type="checkbox"/> | <input type="checkbox"/> <input type="checkbox"/> <input type="checkbox"/> <input type="checkbox"/> | <input type="checkbox"/> |
| 311 | Pentavalent (2)<br>DTP/Hib/HepB | <input type="checkbox"/> 1. Yes<br><input type="checkbox"/> 2. No                                                     | <input type="checkbox"/> <input type="checkbox"/> | <input type="checkbox"/> <input type="checkbox"/> | <input type="checkbox"/> <input type="checkbox"/> <input type="checkbox"/> <input type="checkbox"/> | <input type="checkbox"/> |
| 312 | IPTi 1 (at 10 weeks)            | <input type="checkbox"/> 1. Yes<br><input type="checkbox"/> 2. No<br><input type="checkbox"/> 3. Not recorded/unknown | <input type="checkbox"/> <input type="checkbox"/> | <input type="checkbox"/> <input type="checkbox"/> | <input type="checkbox"/> <input type="checkbox"/> <input type="checkbox"/> <input type="checkbox"/> | <input type="checkbox"/> |
| 313 | Pentavalent (3)<br>DTP/Hib/HepB | <input type="checkbox"/> 1. Yes<br><input type="checkbox"/> 2. No                                                     | <input type="checkbox"/> <input type="checkbox"/> | <input type="checkbox"/> <input type="checkbox"/> | <input type="checkbox"/> <input type="checkbox"/> <input type="checkbox"/> <input type="checkbox"/> | <input type="checkbox"/> |
| 314 | IPTi 2 (at 14 weeks)            | <input type="checkbox"/> 1. Yes<br><input type="checkbox"/> 2. No<br><input type="checkbox"/> 3. Not recorded/unknown | <input type="checkbox"/> <input type="checkbox"/> | <input type="checkbox"/> <input type="checkbox"/> | <input type="checkbox"/> <input type="checkbox"/> <input type="checkbox"/> <input type="checkbox"/> | <input type="checkbox"/> |
| 315 | Measles (1)                     | <input type="checkbox"/> 1. Yes<br><input type="checkbox"/> 2. No                                                     | <input type="checkbox"/> <input type="checkbox"/> | <input type="checkbox"/> <input type="checkbox"/> | <input type="checkbox"/> <input type="checkbox"/> <input type="checkbox"/> <input type="checkbox"/> | <input type="checkbox"/> |
| 316 | IPTi 3 (at 9 months)            | <input type="checkbox"/> 1. Yes<br><input type="checkbox"/> 2. No<br><input type="checkbox"/> 3. Not recorded/unknown | <input type="checkbox"/> <input type="checkbox"/> | <input type="checkbox"/> <input type="checkbox"/> | <input type="checkbox"/> <input type="checkbox"/> <input type="checkbox"/> <input type="checkbox"/> | <input type="checkbox"/> |

| 317 | Measles (2)                                                                                                                                                                                                                                                                                                                                                                                                                                           | <input type="checkbox"/> 1. Yes<br><input type="checkbox"/> 2. No                                                                                   | <input type="checkbox"/> <input type="checkbox"/> | <input type="checkbox"/> <input type="checkbox"/> | <input type="checkbox"/> <input type="checkbox"/> <input type="checkbox"/> <input type="checkbox"/> | <input type="checkbox"/> |
|-----|-------------------------------------------------------------------------------------------------------------------------------------------------------------------------------------------------------------------------------------------------------------------------------------------------------------------------------------------------------------------------------------------------------------------------------------------------------|-----------------------------------------------------------------------------------------------------------------------------------------------------|---------------------------------------------------|---------------------------------------------------|-----------------------------------------------------------------------------------------------------|--------------------------|
| 318 | Insecticide-treated bednet received                                                                                                                                                                                                                                                                                                                                                                                                                   | <input type="checkbox"/> 1. Yes<br><input type="checkbox"/> 2. Info not recorded                                                                    | <input type="checkbox"/> <input type="checkbox"/> | <input type="checkbox"/> <input type="checkbox"/> | <input type="checkbox"/> <input type="checkbox"/> <input type="checkbox"/> <input type="checkbox"/> | <input type="checkbox"/> |
| 319 | Photo of immunization dates from immunization card<br><br>Take photo of the vaccination dates on the immunization card. DO NOT capture <i>Child Health Card Personal Information</i> in your photo.                                                                                                                                                                                                                                                   |                                                                                                                                                     |                                                   |                                                   |                                                                                                     |                          |
| 400 | Recall of Child's Vaccination History<br><br><i>Only when vaccination card not available</i><br><br><i>Otherwise if card available and vaccination dates extracted, then go to → Q407</i>                                                                                                                                                                                                                                                             |                                                                                                                                                     |                                                   |                                                   |                                                                                                     |                          |
| ID  | QUESTION                                                                                                                                                                                                                                                                                                                                                                                                                                              | RESPONSE                                                                                                                                            | GO TO                                             |                                                   |                                                                                                     |                          |
| 401 | Has the child ever received an injection in the right upper arm or shoulder that usually causes a scar? – that is, BCG vaccination (against tuberculosis). <b>This is usually given at birth or very shortly after.</b><br><i>(Den don ever chuke u pikin up e right hand or shoulder wae e kin lef mark dae?, "that na BCG marklate against dri kof. d fos marklate wae den dae gee pikin as den bon am)</i>                                         | <input type="checkbox"/> 1. Yes -----→<br><input type="checkbox"/> 2. No -----→<br><input type="checkbox"/> 3. Don't know-----→                     | Q402<br>Q403<br>Q403                              |                                                   |                                                                                                     |                          |
| 402 | If the child is present, check for evidence of a scar and record                                                                                                                                                                                                                                                                                                                                                                                      | <input type="checkbox"/> 1: Scar Present<br><input type="checkbox"/> 2: No Scar Present<br><input type="checkbox"/> 3: Child not available to check |                                                   |                                                   |                                                                                                     |                          |
| 403 | Has the child ever received an injection on the left thigh? – that is a five-in-one vaccination (pentavalent) to prevent him/her from getting tetanus, whooping cough, diphtheria, influenza & hepatitis. <b>It is usually given to the child at 6 weeks, 10 weeks, and 14 weeks of age.</b><br><i>(den don ever chuke u pikin up e left leg ?) (dat na da five in wan marklate wae dae hep pikin for leh e nor get tetanus,kof en orda sik dem )</i> | <input type="checkbox"/> 1. Yes -----→<br><input type="checkbox"/> 2. No -----→<br><input type="checkbox"/> 3. Don't know -----→                    | Q404<br>Q405<br>Q405                              |                                                   |                                                                                                     |                          |

|     |                                                                                                                                                                                                                                                                                                                        |                                                                                                                                                                                                  |                      |
|-----|------------------------------------------------------------------------------------------------------------------------------------------------------------------------------------------------------------------------------------------------------------------------------------------------------------------------|--------------------------------------------------------------------------------------------------------------------------------------------------------------------------------------------------|----------------------|
| 404 | How many times did the child receive pentavalent vaccine on the left thigh?<br><br><i>(Armos tem dis pikin don take da five in wan marklate na e left leg?)</i>                                                                                                                                                        | Number of times: _____<br><br><i>Enter 99 if don't remember / unsure</i>                                                                                                                         |                      |
| 405 | Has the child ever received an injection on the <b>upper arm</b> ? that is measles injection at the <b>age of 9 months or older</b> - to prevent him/her from getting measles<br><br><i>(den don ever chuke u pikin up e hand da measle injection wae den dae gee am wae e 9 month for mek e nor go get measles ?)</i> | <input type="checkbox"/> 1. Yes -----→<br><input type="checkbox"/> 2. No -----→<br><input type="checkbox"/> 3. Don't know -----→                                                                 | Q406<br>Q407<br>Q407 |
| 406 | How many times was measles vaccine given at a routine immunization session?<br><br><i>(armos tem den gee am mealse marklate d tem dem wae u bi dea kerr am go for marklate?)</i>                                                                                                                                       | Number of times: _____                                                                                                                                                                           |                      |
| 407 | Has (NAME) ever taken the new medication that helps prevent him/her from getting malaria?<br><br><i>((NAME) be don ever take da new meresin wae go hep am for mek e nor get malaria?)</i>                                                                                                                              | <input type="checkbox"/> 1. Yes<br><input type="checkbox"/> 2. No<br><input type="checkbox"/> 3. Don't Know                                                                                      | If 2,3→<br>500       |
| 408 | How many times was (NAME) given the new medication to prevent him/her from getting malaria?<br><br><i>Armos tem (NAME) don take da new meresin wae go hep am for mek e nor get malaria?</i>                                                                                                                            | <input type="checkbox"/> 1. One<br><input type="checkbox"/> 2. Two<br><input type="checkbox"/> 3. Three<br><input type="checkbox"/> 4. More than Three<br><input type="checkbox"/> 5. Don't Know |                      |

|     |                                                                                                                                                                                                                                                                                                |                                                                                                                                                                                                                        |                    |
|-----|------------------------------------------------------------------------------------------------------------------------------------------------------------------------------------------------------------------------------------------------------------------------------------------------|------------------------------------------------------------------------------------------------------------------------------------------------------------------------------------------------------------------------|--------------------|
| 409 | <p>Approximately how long did you have to wait at the health facility to receive the medication that prevents malaria in infants?<br/><i>(Lek how long u get for wait na d hospitul or clinic for get d meresin wae dae make pikin dem nor get malaria?)</i></p>                               | <input type="checkbox"/> 1. Less than 30 minutes<br><input type="checkbox"/> 2. Between 30 minutes and 1 hour<br><input type="checkbox"/> 3. Over 1 hour<br><br><input type="checkbox"/> 77. Unsure of time            |                    |
| 410 | <p>Did (NAME) have any reactions after taking the new medication helping to prevent him/her from getting malaria?<br/><i>(any tin be happen to (NAME) after wae e take da meresin wae dae hep am for mek e nor get malaria?)</i></p>                                                           | <input type="checkbox"/> 1. Yes<br><input type="checkbox"/> 2. No<br><input type="checkbox"/> 3. Don't Know                                                                                                            | If 2,3,<br>99→ 501 |
| 411 | <p>What kind of reaction(s) did {NAME} have?<br/><i>(Wus kin tin dem happen to ram?)</i></p> <p><i>Mark all that apply</i></p>                                                                                                                                                                 | <input type="checkbox"/> 1. Skin rash<br><input type="checkbox"/> 2. Vomiting<br><input type="checkbox"/> 3. Diarrhea<br><input type="checkbox"/> 4. Fever<br><input type="checkbox"/> 5. Other _____<br><br>(SPECIFY) |                    |
| 412 | <p>How long did this reaction last after (NAME) took the medication?<br/><i>(aw long dis tin ya bin last for after (NAME) don take dis new malaria Meresin?)</i></p> <p><i>If more than one reaction, enter the number of days for the reaction that lasted the longest period of time</i></p> | NUMBER OF DAYS<br><br><input type="text"/> <input type="text"/><br><i>Enter 88 if don't know</i><br><i>Enter 99 if declined to answer</i>                                                                              |                    |
| 413 | <p>Did you see a health care provider about the reactions (NAME) had after taking the new malaria prevention medication?<br/><i>(u bi go meet welbodi woke man bot d tin dem way happen to (NAME) after wae e take da new meresin wae dae mek porsin nor get Malaria?)</i></p>                 | <input type="checkbox"/> 1. Yes<br><input type="checkbox"/> 2. No<br><input type="checkbox"/> 3. Don't Know                                                                                                            |                    |

| 500 Availability and Accessibility of Childhood Vaccination Services |                                                                                                                                                                                    |                                                                                                                                                                                                                                                                                                                                                                                                                           |                                                                                                       |
|----------------------------------------------------------------------|------------------------------------------------------------------------------------------------------------------------------------------------------------------------------------|---------------------------------------------------------------------------------------------------------------------------------------------------------------------------------------------------------------------------------------------------------------------------------------------------------------------------------------------------------------------------------------------------------------------------|-------------------------------------------------------------------------------------------------------|
| ID                                                                   | QUESTION                                                                                                                                                                           | RESPONSE                                                                                                                                                                                                                                                                                                                                                                                                                  | GO TO                                                                                                 |
| 501                                                                  | Where did (NAME) receive their most recent immunization?<br><i>(wusai (NAME) get e last Marklate?)</i>                                                                             | <input type="checkbox"/> 1. Public / Government<br><input type="checkbox"/> 2. Private (non-NGO)<br><input type="checkbox"/> 3. NGO<br><input type="checkbox"/> 4. Mission<br><input type="checkbox"/> 5. At home during outreach----- ><br><input type="checkbox"/> 6. School----- ><br><input type="checkbox"/> 7. N/A: Child never vaccinated-----><br><input type="checkbox"/> 88. Don't know / don't remember----- > | <br><br><br><br>Q503<br>Q503<br>Q510<br>Interviewer should show facility list to help elicit response |
| 502                                                                  | What was the name of the health facility where (NAME) receive their most recent immunization?<br><i>(watin na d name of d hospital or clinic wae (NAME) take e last marklate?)</i> | Dropdown list of ALL health facilities, organized by type (categories above). Include option for "other, specified", "Don't know" and "outside of Western Area Urban"                                                                                                                                                                                                                                                     |                                                                                                       |
| 503                                                                  | Has (NAME) always gone for routine immunization at the same site?<br><i>((NAME) kin always go for ein marklate dem na de same sie?)</i>                                            | <input type="checkbox"/> 1. Yes ----- ><br><input type="checkbox"/> 2. No<br><input type="checkbox"/> 99. Don't know ----- >                                                                                                                                                                                                                                                                                              | Q505<br>Q505                                                                                          |

|     |                                                                                                                                                                                                                                                                     |                                                                                                                                                                                                                                                                                                                                                                                                                                                                                                                                                      |                                  |
|-----|---------------------------------------------------------------------------------------------------------------------------------------------------------------------------------------------------------------------------------------------------------------------|------------------------------------------------------------------------------------------------------------------------------------------------------------------------------------------------------------------------------------------------------------------------------------------------------------------------------------------------------------------------------------------------------------------------------------------------------------------------------------------------------------------------------------------------------|----------------------------------|
| 504 | <p>What is the main reason why you did not go to the same site?</p> <p><i>(watin na d main tin wae make u nor go na d same sie?)</i></p> <p><u>Do not read responses</u></p> <p><i>Ask for the main reason and mark ONLY ONE</i></p>                                | <input type="checkbox"/> 1. Family moved<br><input type="checkbox"/> 2. Site (health facility or outreach) closed or moved<br><input type="checkbox"/> 3. Availability of vaccine<br><input type="checkbox"/> 4. Instructed by health care worker<br><input type="checkbox"/> 5. Convenience of location<br><input type="checkbox"/> 6. Other personal preference<br><input type="checkbox"/> 7. Too expensive (facility charges too much)<br><input type="checkbox"/> 8. Lack of funds for transport<br><br><input type="checkbox"/> 9. Other _____ |                                  |
| 505 | <p>Approximately, how long from home does it take to get to your usual vaccination site using your usual type of transportation?</p> <p><i>(lek how long e go take u for komot na hos en go na d sie wae den dae gee marklate if u use d way u kin go dae?)</i></p> | <input type="checkbox"/> 1. Less than 30 minutes<br><input type="checkbox"/> 2. Between 30 minutes and 1 hour<br><input type="checkbox"/> 3. Over 1 hour<br><br><input type="checkbox"/> 77. Unsure of time-----→<br><input type="checkbox"/> 88. Unsure of location of vaccination site-----→                                                                                                                                                                                                                                                       | <br><br><br><br><br>Q507<br>Q507 |
| 506 | <p>How do you view the time it usually takes to reach your usual vaccination site?</p> <p><i>(how u see da tem wae u kin take for go na d sie way u kin go for marklate?)</i></p>                                                                                   | <input type="checkbox"/> 1. Too much time<br><input type="checkbox"/> 2. About right<br><input type="checkbox"/> 3. A short time                                                                                                                                                                                                                                                                                                                                                                                                                     |                                  |
| 507 | <p>Once you are at the vaccination site, approximately how long does it usually take to get (NAME) vaccinated at the site?</p> <p><i>(wae u don reach na d sie wae den dae gee marklate,how long e kin take for mek den gee (NAME) Marklate?)</i></p>               | <input type="checkbox"/> 1. Less than 30 minutes<br><input type="checkbox"/> 2. Between 30 minutes and 1 hour<br><input type="checkbox"/> 3. Over 1 hour<br><br><input type="checkbox"/> 77. Unsure of time -----→                                                                                                                                                                                                                                                                                                                                   | <br><br><br><br>Q509             |

|     |                                                                                                                                                                                                                                                                                         |                                                                                                                                                                                                                                                                                                                                                                                                                                                                                                                                                                                                                                             |                      |
|-----|-----------------------------------------------------------------------------------------------------------------------------------------------------------------------------------------------------------------------------------------------------------------------------------------|---------------------------------------------------------------------------------------------------------------------------------------------------------------------------------------------------------------------------------------------------------------------------------------------------------------------------------------------------------------------------------------------------------------------------------------------------------------------------------------------------------------------------------------------------------------------------------------------------------------------------------------------|----------------------|
| 508 | How do you view the time it usually takes to get your child vaccinated once you arrive at the vaccination site?<br><i>(wae u don reach na d sie wae den dae gee marklate,how u see da tem wae e kin take for mek den gee u pikin Marklate?)</i>                                         | <input type="checkbox"/> 1. Too much time<br><input type="checkbox"/> 2. About right<br><input type="checkbox"/> 3. A short time                                                                                                                                                                                                                                                                                                                                                                                                                                                                                                            |                      |
| 509 | How much are you usually expected to give to healthcare workers during a vaccination visit?<br><i>(armos u feel say u for gee welbodi woke man dem, d tem wae u kerr u pikin for marklate?)</i><br><br><i>Probe to understand payments or gifts that are not required but expected.</i> | <input type="checkbox"/> 1. Nothing<br><input type="checkbox"/> 2. 1,000-5,000 Leones<br><input type="checkbox"/> 3. 6,000-10,000 Leones<br><input type="checkbox"/> 4. >10,000 Leones<br><input type="checkbox"/> 5. Non-monetary gift<br><br><input type="checkbox"/> 88. Don't remember / unsure                                                                                                                                                                                                                                                                                                                                         |                      |
| 510 | Have you ever taken any of your children for vaccination and come home without receiving the vaccination?<br><i>(u don ever kerr any of u pikin dem for marklate en u return back without den nor gee am Marklate?)</i>                                                                 | <input type="checkbox"/> 1. Yes-----→<br><input type="checkbox"/> 2. No-----→<br><input type="checkbox"/> 88. Don't remember / unsure-----→                                                                                                                                                                                                                                                                                                                                                                                                                                                                                                 | Q511<br>Q601<br>Q601 |
| 511 | What was the main reason any of your children did not receive vaccination the last time that happened ( <i>referring to Q510</i> )?<br><i>(watin na d main reason wae den nor gee any wan pa u pikin dem marklate de last tem way u kerram go?)</i>                                     | <input type="checkbox"/> 1. Vaccines were not available<br><input type="checkbox"/> 2. Was not a scheduled vaccination day<br><input type="checkbox"/> 3. The wait was too long<br><input type="checkbox"/> 4. I was asked to pay for service or related materials<br><input type="checkbox"/> 5. I was asked to provide a tip/token of appreciation<br><input type="checkbox"/> 6. I chose not to go through with vaccination<br><input type="checkbox"/> 7. Not enough children to open a vaccination vial at that time<br><input type="checkbox"/> 8. Other (specify: _____)<br><br><input type="checkbox"/> 88. Don't remember / unsure |                      |

The next several questions are about your opinion on vaccination. For every question that I ask, please look at this figure. The biggest circle means “very much”, the second circle means “somewhat”, the small circle means “very little” and no circle means “not at all”. Please point to the circle that relates to how much you feel about every question.

(D Next question dem wae ar dae kam ask,na watin u think bot vaccination.any question wae ar ask du ya ,luk pa dis picture. De big circle mean Boku Boku wan ,de second circle mean,haf en haf,de small circle mean small ,en d sie wae u nor dae see circle mean,Natin . Duya point pa d circle u tink sae feba u answer)

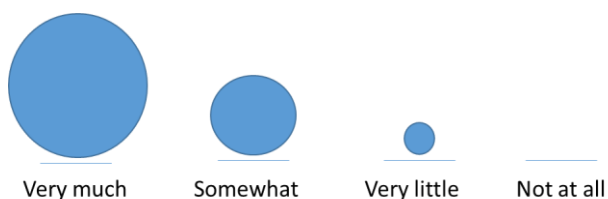



| 600 | Vaccination Acceptance and Demand                                                                                                                                                                                                                                                                                                                                                 |                                                                                                                                                                                                                           |       |
|-----|-----------------------------------------------------------------------------------------------------------------------------------------------------------------------------------------------------------------------------------------------------------------------------------------------------------------------------------------------------------------------------------|---------------------------------------------------------------------------------------------------------------------------------------------------------------------------------------------------------------------------|-------|
| ID  | QUESTION                                                                                                                                                                                                                                                                                                                                                                          | RESPONSE                                                                                                                                                                                                                  | GO TO |
| 601 | <p>How much do you think that vaccines are good for your child?</p> <p><i>(armos u tink say marklate good for u pikin?)</i></p> <p><i>Note: Point to the visual scale, and ask which one of the circles represent how much he/she thinks vaccines are good</i></p> <p><i>(Lek dis much, or dis much, or dat much? Ose wan wae dae show armos u think say marklet good...)</i></p> | <input type="checkbox"/> 1. Very much<br><input type="checkbox"/> 2. Somewhat<br><input type="checkbox"/> 3. Very little<br><input type="checkbox"/> 4. Not at all<br><br><input type="checkbox"/> 99. Declined to answer |       |
| 602 | <p>How much do you think that vaccines are safe for your child?</p> <p><i>(Armos u tink say marklet na tin wae safe for u pikin?)</i></p>                                                                                                                                                                                                                                         | <input type="checkbox"/> 1. Very much<br><input type="checkbox"/> 2. Somewhat<br><input type="checkbox"/> 3. Very little<br><input type="checkbox"/> 4. Not at all<br><br><input type="checkbox"/> 99. Declined to answer |       |
| 603 | <p>How much do you think that vaccines protect your child against diseases?</p> <p><i>(armos u think say marklate dae hep u pikin for mek e nor get sik dem?)</i></p>                                                                                                                                                                                                             | <input type="checkbox"/> 1. Very much<br><input type="checkbox"/> 2. Somewhat<br><input type="checkbox"/> 3. Very little<br><input type="checkbox"/> 4. Not at all<br><br><input type="checkbox"/> 99. Declined to answer |       |
| 604 | <p>How much do you feel confident in your ability to take your child for scheduled vaccination visits?</p> <p><i>(Armos u feel say u go always able for take you pikin for all e maklate dem wae di tem reach?)</i></p>                                                                                                                                                           | <input type="checkbox"/> 1. Very much<br><input type="checkbox"/> 2. Somewhat<br><input type="checkbox"/> 3. Very little<br><input type="checkbox"/> 4. Not at all<br><br><input type="checkbox"/> 99. Declined to answer |       |
| 605 | <p>How much would you encourage others to get their children vaccinated?</p> <p><i>(armos u able encourage orda combra dem for take dem pikin go for marklate?)</i></p>                                                                                                                                                                                                           | <input type="checkbox"/> 1. Very much<br><input type="checkbox"/> 2. Somewhat<br><input type="checkbox"/> 3. Very little<br><input type="checkbox"/> 4. Not at all<br><br><input type="checkbox"/> 99. Declined to answer |       |

|     |                                                                                                                                                                                                                                                |                                                                                                                                                                                                                           |  |
|-----|------------------------------------------------------------------------------------------------------------------------------------------------------------------------------------------------------------------------------------------------|---------------------------------------------------------------------------------------------------------------------------------------------------------------------------------------------------------------------------|--|
| 606 | <p>How much do people in your community value childhood vaccination services?</p> <p><i>(Armos u tink say pipul dem na u area really see say e impotant for marklate pikin dem?)</i></p>                                                       | <input type="checkbox"/> 1. Very much<br><input type="checkbox"/> 2. Somewhat<br><input type="checkbox"/> 3. Very little<br><input type="checkbox"/> 4. Not at all<br><br><input type="checkbox"/> 99. Declined to answer |  |
| 607 | <p>How much does your spouse, partner, or other family members in your household approve of childhood vaccination?</p> <p><i>(Armos u tink say u man (uman) or other family member dem na di same pot go gree for gee pikin marklate?)</i></p> | <input type="checkbox"/> 1. Very much<br><input type="checkbox"/> 2. Somewhat<br><input type="checkbox"/> 3. Very little<br><input type="checkbox"/> 4. Not at all<br><br><input type="checkbox"/> 99. Declined to answer |  |
| 608 | <p>How much do other parents in your community approve of childhood vaccination?</p> <p><i>(Armos u tink say orda combra dem na u area go gree for gee pikin marklate?)</i></p>                                                                | <input type="checkbox"/> 1. Very much<br><input type="checkbox"/> 2. Somewhat<br><input type="checkbox"/> 3. Very little<br><input type="checkbox"/> 4. Not at all<br><br><input type="checkbox"/> 99. Declined to answer |  |
| 609 | <p>How much do trusted leaders in your community approve of childhood vaccination?</p> <p><i>(Armos u think say d leaders dem (or big wan dem) wae pipul kin listen to na una area, kin da gree for make pikin dem take marklate?)</i></p>     | <input type="checkbox"/> 1. Very much<br><input type="checkbox"/> 2. Somewhat<br><input type="checkbox"/> 3. Very little<br><input type="checkbox"/> 4. Not at all<br><br><input type="checkbox"/> 99. Declined to answer |  |
| 610 | <p>How much does your religion influence vaccination decisions for your child?</p> <p><i>(Armos u tink say u religion kin dae affect u decision for take the pikin go for marklate?)</i></p>                                                   | <input type="checkbox"/> 1. Very much<br><input type="checkbox"/> 2. Somewhat<br><input type="checkbox"/> 3. Very little<br><input type="checkbox"/> 4. Not at all<br><br><input type="checkbox"/> 99. Declined to answer |  |

|     |                                                                                                                                                                                                     |                                                                                                                                                                                                                           |  |
|-----|-----------------------------------------------------------------------------------------------------------------------------------------------------------------------------------------------------|---------------------------------------------------------------------------------------------------------------------------------------------------------------------------------------------------------------------------|--|
| 611 | How much of a health threat do you think measles is for children who are unvaccinated?<br><br><i>(Armos u tink say measles go hamborg pikin ein wellbodi wan wae nor take marklate?)</i>            | <input type="checkbox"/> 1. Very much<br><input type="checkbox"/> 2. Somewhat<br><input type="checkbox"/> 3. Very little<br><input type="checkbox"/> 4. Not at all<br><br><input type="checkbox"/> 99. Declined to answer |  |
| 612 | How much would you say childhood vaccination goes together with your religious beliefs?<br><br><i>(Armos u tink u religion gree for pikin marklate?)</i>                                            | <input type="checkbox"/> 1. Very much<br><input type="checkbox"/> 2. Somewhat<br><input type="checkbox"/> 3. Very little<br><input type="checkbox"/> 4. Not at all<br><br><input type="checkbox"/> 99. Declined to answer |  |
| 613 | How much do you think the illnesses which vaccination prevent are severe?<br><br><i>(Armos u tink say small-pikin sickness dem (lek measles and polio) go cause serious problem for pikin dem?)</i> | <input type="checkbox"/> 1. Very much<br><input type="checkbox"/> 2. Somewhat<br><input type="checkbox"/> 3. Very little<br><input type="checkbox"/> 4. Not at all<br><br><input type="checkbox"/> 99. Declined to answer |  |

*For next set of questions (700-717) you may say “yes” “unsure” or “no” to tell us about your observations and experiences with childhood vaccination.*

| 700 | Vaccination Experiences and Behaviors                                                                                                                                                                                         |                                                                                                                                                                                                                                                   |                                  |
|-----|-------------------------------------------------------------------------------------------------------------------------------------------------------------------------------------------------------------------------------|---------------------------------------------------------------------------------------------------------------------------------------------------------------------------------------------------------------------------------------------------|----------------------------------|
| ID  | QUESTION                                                                                                                                                                                                                      | RESPONSE                                                                                                                                                                                                                                          | GO TO                            |
| 701 | Do you know of any child in your family or community that has experienced vaccine side effects in the last year?<br><br><i>(u sabie any pikin na u family or na u area wae marklate don hamborg insie dis pass one year?)</i> | <input type="checkbox"/> 1. Yes-----→<br><input type="checkbox"/> 2. No-----→<br><input type="checkbox"/> 3. Unsure -----→<br><br><input type="checkbox"/> 99. Declined to answer                                                                 | <br><br><br>Q702<br>Q703<br>Q703 |
| 702 | How serious was the vaccine side effect?<br><br><i>(how dis tin ya be muna ram?)</i>                                                                                                                                          | <input type="checkbox"/> 1. Not at all serious<br><input type="checkbox"/> 2. A little serious<br><input type="checkbox"/> 3. Somewhat serious<br><input type="checkbox"/> 4. Very serious<br><br><input type="checkbox"/> 99. Declined to answer |                                  |

|     |                                                                                                                                                                                                                                                              |                                                                                                                                                                                                                                                                                                                                                                                                                                                                                                                                                                                                                                                                                                                                                                                                                                                                                                   |                                                 |
|-----|--------------------------------------------------------------------------------------------------------------------------------------------------------------------------------------------------------------------------------------------------------------|---------------------------------------------------------------------------------------------------------------------------------------------------------------------------------------------------------------------------------------------------------------------------------------------------------------------------------------------------------------------------------------------------------------------------------------------------------------------------------------------------------------------------------------------------------------------------------------------------------------------------------------------------------------------------------------------------------------------------------------------------------------------------------------------------------------------------------------------------------------------------------------------------|-------------------------------------------------|
| 703 | <p>Have you ever refused getting a recommended vaccine for your child?<br/>By refused, I mean, have you ever turned down vaccination services or chosen not to have your child vaccinated?</p> <p><i>(u don ever deny marklate way u pikin for get?)</i></p> | <input type="checkbox"/> 1. Yes-----→<br><input type="checkbox"/> 2. No-----→<br><input type="checkbox"/> 3. Unsure-----→<br><br><input type="checkbox"/> 99. Declined to answer -----→                                                                                                                                                                                                                                                                                                                                                                                                                                                                                                                                                                                                                                                                                                           | <p>Q704</p> <p>Q705</p> <p>Q705</p> <p>Q705</p> |
| 704 | <p>What was the reason for refusing the recommended vaccine(s) for your child?</p> <p><i>(for wus reason wae mek u deny marklate way u pikin for get?)</i></p> <p>(multiple selections allowed; do not read)</p> <p><u>PROBE: Any other reasons?</u></p>     | <input type="checkbox"/> 1. Lack of trust in vaccine<br><input type="checkbox"/> 2. Lack of trust in vaccinator<br><input type="checkbox"/> 3. Lack of trust in health system<br><input type="checkbox"/> 4. Administering too many vaccines in the same visit<br><input type="checkbox"/> 5. Fear of vaccination side effects or past experience with vaccination side effects<br><input type="checkbox"/> 6. Concerns about cost<br><input type="checkbox"/> 7. Religious concerns<br><input type="checkbox"/> 8. Fertility concerns<br><input type="checkbox"/> 9. Lack of benefit to vaccinate<br><input type="checkbox"/> 10. Negative experiences with healthcare providers<br><input type="checkbox"/> 11. Other (specify)<br><input type="checkbox"/> 12. No particular reasons<br><br><input type="checkbox"/> 88. Don't remember why<br><input type="checkbox"/> 99. Declined to answer |                                                 |
| 705 | <p>Have you ever delayed getting a recommended vaccine for your child?</p> <p><i>(u don ever miss d tem for u pikin for take marklate?)</i></p>                                                                                                              | <input type="checkbox"/> 1. Yes-----→<br><input type="checkbox"/> 2. No-----→<br><input type="checkbox"/> 3. Unsure -----→<br><br><input type="checkbox"/> 99. Declined to answer -----→                                                                                                                                                                                                                                                                                                                                                                                                                                                                                                                                                                                                                                                                                                          | <p>Q706</p> <p>Q707</p> <p>Q707</p> <p>Q707</p> |

|     |                                                                                                                                                                                                                                                                                  |                                                                                                                                                                                                                                                                                                                                                                                                                                                                                                                                                                                                                                                                                                                                                                                                                                                                                                                                                                                                                                                                                                                                                                                                                                                              |  |
|-----|----------------------------------------------------------------------------------------------------------------------------------------------------------------------------------------------------------------------------------------------------------------------------------|--------------------------------------------------------------------------------------------------------------------------------------------------------------------------------------------------------------------------------------------------------------------------------------------------------------------------------------------------------------------------------------------------------------------------------------------------------------------------------------------------------------------------------------------------------------------------------------------------------------------------------------------------------------------------------------------------------------------------------------------------------------------------------------------------------------------------------------------------------------------------------------------------------------------------------------------------------------------------------------------------------------------------------------------------------------------------------------------------------------------------------------------------------------------------------------------------------------------------------------------------------------|--|
| 706 | <p>What was the reason or barriers for delaying the recommended vaccine(s) for your child?</p> <p><i>(watin na d tin dem wae mek ,u miss d tem wae u pikin for take marklate?)</i></p> <p>(multiple selections allowed; do not read)</p> <p><u>PROBE: Any other reasons?</u></p> | <input type="checkbox"/> 1. Lack of trust in vaccine<br><input type="checkbox"/> 2. Lack of trust in vaccinator<br><input type="checkbox"/> 3. Lack of trust in health system<br><input type="checkbox"/> 4. Administering too many vaccines in the same visit<br><input type="checkbox"/> 5. Fear of vaccination side effects or past experience with side effects<br><input type="checkbox"/> 6. Long waiting time at vaccination site<br><input type="checkbox"/> 7. Long distance to get to vaccination site<br><input type="checkbox"/> 8. Lack of time to take the child (working, travel, other priorities)<br><input type="checkbox"/> 9. Lack of funds to pay for transportation<br><input type="checkbox"/> 10. Lack of funds to pay the tip/token of appreciation for providers<br><input type="checkbox"/> 11. Religious concerns<br><input type="checkbox"/> 12. Fertility concerns<br><input type="checkbox"/> 13. Lack of benefit to vaccinate<br><input type="checkbox"/> 14. Negative experiences with healthcare providers<br><input type="checkbox"/> 15. Other (specify)<br><input type="checkbox"/> 16. No particular reasons<br><br><input type="checkbox"/> 88. Don't remember why<br><input type="checkbox"/> 99. Declined to answer |  |
| 707 | <p>If you have another child in the future, do you plan to accept ALL recommended vaccinations for him/her?</p> <p><i>(if u get orda pikin tumara,u go plan for leh e get ol d marklate wae e suppose for get?)</i></p>                                                          | <input type="checkbox"/> 1. Yes<br><input type="checkbox"/> 2. No<br><input type="checkbox"/> 3. Unsure<br><br><input type="checkbox"/> 99. Declined to answer                                                                                                                                                                                                                                                                                                                                                                                                                                                                                                                                                                                                                                                                                                                                                                                                                                                                                                                                                                                                                                                                                               |  |

*For the next set of questions (801-811) we would like to learn more about your social support, trusted information sources, and preferred ways of getting information about childhood vaccination services.*

*(Next question dem we go lek for no bot aw u dae get ep from pipul dem,de sai dem wae u belif for get information,en d way dem wae u dae get information bot u pikin marklate wan)*

|     |                                                                                  |                                                                              |       |
|-----|----------------------------------------------------------------------------------|------------------------------------------------------------------------------|-------|
| 800 | Social support, trusted information sources and preferred communication channels |                                                                              |       |
| ID  | QUESTION                                                                         | RESPONSE                                                                     | GO TO |
| 801 | The last time (NAME) was vaccinated, who took him/her to the vaccination site?   | <input type="checkbox"/> 1. Mother<br><br><input type="checkbox"/> 2. Father |       |

|     |                                                                                                                                                                                                                    |                                                                                                                                                                                                                                                                                                                                                                                                                                                                                                                                                                                                                                                                                                                                                                                         |  |
|-----|--------------------------------------------------------------------------------------------------------------------------------------------------------------------------------------------------------------------|-----------------------------------------------------------------------------------------------------------------------------------------------------------------------------------------------------------------------------------------------------------------------------------------------------------------------------------------------------------------------------------------------------------------------------------------------------------------------------------------------------------------------------------------------------------------------------------------------------------------------------------------------------------------------------------------------------------------------------------------------------------------------------------------|--|
|     | <p><i>(de last tem wae den marklate d pikin,na wudat bi kerr am go d sie wae den bi marklate tam?)</i></p> <p>(Multiple selection allowed; do not read)</p>                                                        | <input type="checkbox"/> 3. Grandmother<br><input type="checkbox"/> 4. Grandfather<br><input type="checkbox"/> 5. Sibling<br><input type="checkbox"/> 6. Other relative (specify)<br><input type="checkbox"/> 7. Other non-relative (specify)<br><br><input type="checkbox"/> 66. Vaccinated at home during outreach<br><input type="checkbox"/> 77. Child has never been vaccinated<br><input type="checkbox"/> 88. Don't remember / unsure<br><input type="checkbox"/> 99. Declined to answer                                                                                                                                                                                                                                                                                         |  |
| 802 | <p>Through which means do you <u>usually</u> receive information about childhood vaccination?</p> <p><i>(wus way u dae get information more bot pikin marklate ?)</i></p> <p>(Read all, and ask to select one)</p> | <input type="checkbox"/> 1. Household visits<br><input type="checkbox"/> 2. Community-based events<br><input type="checkbox"/> 3. Radio programming<br><input type="checkbox"/> 4. Television programming<br><input type="checkbox"/> 5. Social media (e.g. Facebook)<br><input type="checkbox"/> 6. Mosque / church<br><input type="checkbox"/> 7. Health facility (any type)<br><input type="checkbox"/> 8. Pharmacy<br><input type="checkbox"/> 9. Text messages<br><input type="checkbox"/> 10. Voice messaging (on mobile phones)<br><input type="checkbox"/> 11. Other (specify)<br><br><input type="checkbox"/> 77. I don't receive information from any of these sources<br><input type="checkbox"/> 88. Don't know / unsure<br><input type="checkbox"/> 99. Declined to answer |  |
| 803 | <p>Which of the following means do you <u>prefer the most</u> to receive information about childhood vaccination?</p>                                                                                              | <input type="checkbox"/> 1. Household visits<br><input type="checkbox"/> 2. Community-based events<br><input type="checkbox"/> 3. Radio programming<br><input type="checkbox"/> 4. Television programming                                                                                                                                                                                                                                                                                                                                                                                                                                                                                                                                                                               |  |

|     |                                                                                                                                                                                     |                                                                                                                                                                                                                                                                                                                                                                                                                                                                                                                                                                                                                                                                                                                                                                                                                                                                                                        |  |
|-----|-------------------------------------------------------------------------------------------------------------------------------------------------------------------------------------|--------------------------------------------------------------------------------------------------------------------------------------------------------------------------------------------------------------------------------------------------------------------------------------------------------------------------------------------------------------------------------------------------------------------------------------------------------------------------------------------------------------------------------------------------------------------------------------------------------------------------------------------------------------------------------------------------------------------------------------------------------------------------------------------------------------------------------------------------------------------------------------------------------|--|
|     | <p><i>(pa deh wan ya ,ar dae cam read na ,wus wan u go lek for dae get information bot pikin marklate)</i></p> <p>(Read all, and ask to select one)</p>                             | <input type="checkbox"/> 5. Social media (e.g. Facebook)<br><input type="checkbox"/> 6. Mosque / church<br><input type="checkbox"/> 7. Health facility (any type)<br><input type="checkbox"/> 8. Pharmacy<br><input type="checkbox"/> 9. Text messages<br><input type="checkbox"/> 10. Voice messaging (on mobile phones)<br><input type="checkbox"/> 11. Other (specify)<br><br><input type="checkbox"/> 77. I don't have a preference<br><input type="checkbox"/> 88. Don't know / unsure<br><input type="checkbox"/> 99. Declined to answer                                                                                                                                                                                                                                                                                                                                                         |  |
| 804 | <p>Who do you trust the most to talk to you about childhood vaccination?</p> <p><i>(wudat u belief more for tok to bot pikin marklate?)</i></p> <p>(Select up to three choices)</p> | <input type="checkbox"/> 1. Spouse<br><input type="checkbox"/> 2. Child's grandparents<br><input type="checkbox"/> 3. Other relatives<br><input type="checkbox"/> 4. Friends and neighbors<br><input type="checkbox"/> 5. Other parents and caregivers<br><input type="checkbox"/> 6. Community leader (e.g. chief, village leader)<br><input type="checkbox"/> 7. Faith leader<br><input type="checkbox"/> 8. Traditional birth attendant (TBA)<br><input type="checkbox"/> 9. Traditional healer<br><input type="checkbox"/> 10. Community health worker<br><input type="checkbox"/> 11. Health provider (e.g. nurse, doctor, vaccinator)<br><input type="checkbox"/> 12. Pharmacist<br><input type="checkbox"/> 13. Other (specify)<br><br><input type="checkbox"/> 77. I don't trust anyone<br><input type="checkbox"/> 88. Don't know / unsure<br><input type="checkbox"/> 99. Declined to answer |  |

|     |                                                                                                                                                                                                                                                                                                              |                                                                                                                                                                                                                                               |  |
|-----|--------------------------------------------------------------------------------------------------------------------------------------------------------------------------------------------------------------------------------------------------------------------------------------------------------------|-----------------------------------------------------------------------------------------------------------------------------------------------------------------------------------------------------------------------------------------------|--|
| 805 | <p>If you could add an additional vaccination site, where would you like it to be?</p> <p><i>READ ALL ANSWERS. SELECT ONE.</i></p> <p><i>(if u go want for mek dem add one more sai for take maklate, usai u go want mek e dae?)</i></p> <p><i>Near you ose, or near you wok place or near di markit</i></p> | <input type="checkbox"/> 1. Close to home<br><input type="checkbox"/> 2. Close to work<br><input type="checkbox"/> 3. Close to the market<br><input type="checkbox"/> 4. No preference<br><br><input type="checkbox"/> 99. Declined to answer |  |
|-----|--------------------------------------------------------------------------------------------------------------------------------------------------------------------------------------------------------------------------------------------------------------------------------------------------------------|-----------------------------------------------------------------------------------------------------------------------------------------------------------------------------------------------------------------------------------------------|--|

For the next question, please look at this figure. The biggest circle means “very important”, the second circle means “somewhat important, and no circle means “not at all important”. Please point to the circle that relates to how much you feel about every question.

*(for d next question, ar wan mek u look den round tin dem ya ,d bigwan mean e important gbain,d second wan mean haf en haf and d last wan mean e nor important at ol,point to d wan wae u think sae e feba u answer)*

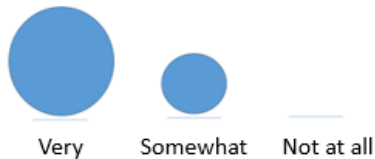

|     |                                                                                                                                                                                          |                                                                                                                                                                                                                                                   |  |
|-----|------------------------------------------------------------------------------------------------------------------------------------------------------------------------------------------|---------------------------------------------------------------------------------------------------------------------------------------------------------------------------------------------------------------------------------------------------|--|
| 806 | <p>How important is it to you that vaccination services are offered on weekends/evenings?</p> <p><i>(aw important e be to u for leh den dae gee marklate de weekend or eventem?)</i></p> | <input type="checkbox"/> 1. Very important<br><input type="checkbox"/> 2. Somewhat important<br><input type="checkbox"/> 3. Not at all important<br><input type="checkbox"/> 4. Don't Know<br><br><input type="checkbox"/> 99. Declined to answer |  |
|-----|------------------------------------------------------------------------------------------------------------------------------------------------------------------------------------------|---------------------------------------------------------------------------------------------------------------------------------------------------------------------------------------------------------------------------------------------------|--|

|     |                                                                                                                  |  |  |
|-----|------------------------------------------------------------------------------------------------------------------|--|--|
| 900 | <p><b>Bednet use</b></p> <p><i>I will now ask you some questions about malaria and malaria prevention...</i></p> |  |  |
|-----|------------------------------------------------------------------------------------------------------------------|--|--|

| ID  | QUESTION                                                                                                                                                                                                 | RESPONSE                                                                                                            | GO TO |
|-----|----------------------------------------------------------------------------------------------------------------------------------------------------------------------------------------------------------|---------------------------------------------------------------------------------------------------------------------|-------|
| 901 | <p>Are insecticide-treated mosquito nets provided during routine vaccination visits at your local vaccination site?</p> <p><i>(De sie wae wuna kin go for marklate wae dae near wuna,den kin gee</i></p> | <input type="checkbox"/> 1. Yes<br><br><input type="checkbox"/> 2. No<br><br><input type="checkbox"/> 3. Don't Know |       |



|      |                                                                                                                                     |                                                                                                                                                                                                                                                                                                                                                                                                                            |                       |
|------|-------------------------------------------------------------------------------------------------------------------------------------|----------------------------------------------------------------------------------------------------------------------------------------------------------------------------------------------------------------------------------------------------------------------------------------------------------------------------------------------------------------------------------------------------------------------------|-----------------------|
|      | <i>mosquito net way get meresin wae combra dem kin go for marklate?)</i>                                                            | <input type="checkbox"/> 99. Declined to answer                                                                                                                                                                                                                                                                                                                                                                            |                       |
| 902  | Does your household have an insecticide-treated mosquito net?<br><br><i>(wuna get tent wae get meresin pa nam na dis hos/pot? )</i> | <input type="checkbox"/> 1. Yes<br><input type="checkbox"/> 2. No<br><input type="checkbox"/> 99. Declined to answer                                                                                                                                                                                                                                                                                                       | 2→1001<br><br>99→1001 |
| 902a | How many insecticide-treated mosquito nets does your household have?<br><br><i>(armos tent wuna get ?)</i>                          | NUMBER OF NETS<br><br><input type="text"/> <input type="text"/><br><br><i>Enter 88 if don't know</i><br><br><i>Enter 99 if declined to answer</i>                                                                                                                                                                                                                                                                          |                       |
| 902b | How many insecticide-treated mosquito nets are hanging in your household?<br><br><i>(armos pa d tent dem wae u get heng ?)</i>      | NUMBER OF NETS<br><br><input type="text"/> <input type="text"/><br><br><i>Enter 88 if don't know</i><br><br><i>Enter 99 if declined to answer</i>                                                                                                                                                                                                                                                                          |                       |
| 903  | Where did you get your most recent treated mosquito net from?<br><br><i>(wusai u get d maskita tent wae u get ?)</i>                | <input type="checkbox"/> 1. Routine vaccination visit<br><input type="checkbox"/> 2. Malaria bednet distribution campaign<br><input type="checkbox"/> 3. From a community health worker<br><input type="checkbox"/> 4. From a neighbor or friend<br><input type="checkbox"/> 5. Purchased one<br><input type="checkbox"/> 6. Antenatal care<br><input type="checkbox"/> 7. Other<br><input type="checkbox"/> 8. Don't know | 2,3,4,5→<br>906       |
| 904  | During a routine vaccination visit, do you ever recall receiving mosquito net education on <u>how</u> to use it?                    | <input type="checkbox"/> 1. Yes<br><input type="checkbox"/> 2. No                                                                                                                                                                                                                                                                                                                                                          |                       |

|     |                                                                                                                                                                                                               |                                                                                                                                                                                                                                                                                                                                                                                                                                                                                                                                                                                                              |                         |
|-----|---------------------------------------------------------------------------------------------------------------------------------------------------------------------------------------------------------------|--------------------------------------------------------------------------------------------------------------------------------------------------------------------------------------------------------------------------------------------------------------------------------------------------------------------------------------------------------------------------------------------------------------------------------------------------------------------------------------------------------------------------------------------------------------------------------------------------------------|-------------------------|
|     | <i>(da tem wae den bi gee u da maskita tent den bi tell u how for use am?)</i>                                                                                                                                | <input type="checkbox"/> 3. Don't Know<br><input type="checkbox"/> 99. Declined to answer                                                                                                                                                                                                                                                                                                                                                                                                                                                                                                                    |                         |
| 905 | <p>During a routine vaccination visit, do you ever recall receiving mosquito net education on <u>why</u> to use it?</p> <p><i>(da tem wae den bi gee u da maskita tent den bi tell u why for use am?)</i></p> | <input type="checkbox"/> 1. Yes<br><input type="checkbox"/> 2. No<br><input type="checkbox"/> 3. Don't Know<br><input type="checkbox"/> 99. Declined to answer                                                                                                                                                                                                                                                                                                                                                                                                                                               |                         |
| 906 | <p>Did (NAME) sleep under a treated mosquito net last night?</p> <p><i>((NAME) bin sleep pa maskita tent last net?)</i></p>                                                                                   | <input type="checkbox"/> 1. Yes<br><input type="checkbox"/> 2. No<br><input type="checkbox"/> 3. Don't Know<br><input type="checkbox"/> 99. Declined to answer                                                                                                                                                                                                                                                                                                                                                                                                                                               | <p>1,3→</p> <p>1001</p> |
| 907 | <p>Could you please share why (NAME) did not sleep inside a treated mosquito net last night?</p> <p><i>(u able tell mi, why u nor sleep pa maskita tent last net?)</i></p>                                    | <input type="checkbox"/> 1. Not worried about Malaria<br><input type="checkbox"/> 2. Do not own net<br><input type="checkbox"/> 3. Net used for bathing/fishing/other use<br><input type="checkbox"/> 4. Did not know infant should sleep under a net<br><input type="checkbox"/> 5. Nets are not effective at preventing malaria<br><input type="checkbox"/> 6. Neighbors don't use mosquito nets<br><input type="checkbox"/> 7. It is too hot under the mosquito nets<br><input type="checkbox"/> 8. Nets are used mostly by adults in the household<br><input type="checkbox"/> 9. Other; (SPECIFY) _____ |                         |

|      |                                                                          |                                                                                                                                  |       |
|------|--------------------------------------------------------------------------|----------------------------------------------------------------------------------------------------------------------------------|-------|
| 1000 | DWELLING CHARACTERISTICS                                                 |                                                                                                                                  |       |
| ID   | QUESTION                                                                 | RESPONSE                                                                                                                         | GO TO |
| 1001 | What is the main source of drinking water for members of your household? | <input type="checkbox"/> 1. Piped water<br><input type="checkbox"/> 2. Dug well<br><input type="checkbox"/> 3. Water from spring |       |

|      |                                                                                                                                 |                                                                                                                                                                                                                                                                                                                                                                                                                                                                              |                |
|------|---------------------------------------------------------------------------------------------------------------------------------|------------------------------------------------------------------------------------------------------------------------------------------------------------------------------------------------------------------------------------------------------------------------------------------------------------------------------------------------------------------------------------------------------------------------------------------------------------------------------|----------------|
|      | <i>(wusai na d main sie wae u dae get wata for drink?)</i>                                                                      | <input type="checkbox"/> 4. Surface water (river/dam)<br><input type="checkbox"/> 5. Water tank<br><input type="checkbox"/> 6. Purchase filtered water-----→                                                                                                                                                                                                                                                                                                                 | Q1004          |
| 1002 | Where is that water source located?<br><br><i>(wusai wuna kin get wata dae?)</i>                                                | <input type="checkbox"/> 1. In own home-----→<br><input type="checkbox"/> 2. In own yard/plot-----→<br><input type="checkbox"/> 3. Elsewhere                                                                                                                                                                                                                                                                                                                                 | Q1004<br>Q1004 |
| 1003 | How long does it take to go there, get water, and come back?<br><br><i>(armos for take for go get wata en cam back?)</i>        | <input type="checkbox"/> <input type="checkbox"/> Minutes<br><input type="checkbox"/> Don't know                                                                                                                                                                                                                                                                                                                                                                             |                |
| 1004 | What kind of toilet facility do members of your household usually use?<br><br><i>(wus kin toilet wae wuna dae use all tem?)</i> | <input type="checkbox"/> 1. Flush or pour flush toilet<br><input type="checkbox"/> 2. Pit latrine<br><input type="checkbox"/> 3. Bucket/hanging toilet/plastic bags                                                                                                                                                                                                                                                                                                          |                |
| 1005 | What type of fuel does your household mainly use for cooking?<br><br><i>(watin wuna dae use for cook?)</i>                      | <input type="checkbox"/> 1. Electricity<br><input type="checkbox"/> 2. Log<br><input type="checkbox"/> 3. Natural gas<br><input type="checkbox"/> 4. Biogas<br><input type="checkbox"/> 5. Kerosene<br><input type="checkbox"/> 6. Charcoal<br><input type="checkbox"/> 7. Wood<br><input type="checkbox"/> 8. Straw/shrubs/grass<br><input type="checkbox"/> 9. Agricultural crop<br><input type="checkbox"/> 10. Animal dung<br><input type="checkbox"/> 11 No food cooked |                |

|      |                                                                                                                                                                                                                                                                                                            |                                                                                                                                                                                                                                                                                                                                                                                                                              |  |
|------|------------------------------------------------------------------------------------------------------------------------------------------------------------------------------------------------------------------------------------------------------------------------------------------------------------|------------------------------------------------------------------------------------------------------------------------------------------------------------------------------------------------------------------------------------------------------------------------------------------------------------------------------------------------------------------------------------------------------------------------------|--|
|      |                                                                                                                                                                                                                                                                                                            | <input type="checkbox"/> 12. Other                                                                                                                                                                                                                                                                                                                                                                                           |  |
| 1006 | Does your household have:<br><br>Electricity? ( <i>wuna ose get light?</i> )<br><br>A Radio? ( <i>Radio</i> )<br><br>A television? ( <i>Television?</i> )<br><br>A mobile telephone? ( <i>mobilefone?</i> )<br><br>A land line telephone? ( <i>telephone?</i> )<br><br>A refrigerator? ( <i>freezer?</i> ) | <input type="checkbox"/> 1. Yes <input type="checkbox"/> 1. No<br><br><input type="checkbox"/> 2. Yes <input type="checkbox"/> 2. No<br><br><input type="checkbox"/> 3. Yes <input type="checkbox"/> 3. No<br><br><input type="checkbox"/> 4. Yes <input type="checkbox"/> 4. No<br><br><input type="checkbox"/> 5. Yes <input type="checkbox"/> 5. No<br><br><input type="checkbox"/> 6. Yes <input type="checkbox"/> 6. No |  |
| 1007 | Main material of the floor<br><br>ENUMERATOR: OBSERVE (DO NOT ASK)                                                                                                                                                                                                                                         | <input type="checkbox"/> 1. Natural floor (ex. earth, sand, dung)<br><br><input type="checkbox"/> 2. Rudimentary floor (ex. bamboo, wood planks)<br><br><input type="checkbox"/> 3. Finished floor (ex. cement, carpet, wood, tiles)                                                                                                                                                                                         |  |
| 1008 | Main material of the roof<br><br>ENUMERATOR: OBSERVE (DO NOT ASK)                                                                                                                                                                                                                                          | <input type="checkbox"/> 1. Natural roofing (ex. thatch, palm, sod)<br><br><input type="checkbox"/> 2. Rudimentary roofing (ex. bamboo, wood planks)<br><br><input type="checkbox"/> 3. Finished roofing (ex. cement, shingles, wood, corrugated iron)                                                                                                                                                                       |  |
| 1009 | Main material of exterior walls<br><br>RECORD OBSERVATION                                                                                                                                                                                                                                                  | <input type="checkbox"/> 1. Natural walls (ex. no walls, cane, palm, dirt)<br><br><input type="checkbox"/> 2. Rudimentary walls (ex. bamboo, mud, plywood, corrugated iron)<br><br><input type="checkbox"/> 3. Finished walls (ex. cement, stone, brick, wood)                                                                                                                                                               |  |
| 1010 | GPS                                                                                                                                                                                                                                                                                                        |                                                                                                                                                                                                                                                                                                                                                                                                                              |  |

Comments: Please add any additional comments or observations about the interview.

**END:**

*Thank you for sharing your experiences and opinions relating to childhood vaccination in your community. The information you provided is valuable, and will help the Sierra Leone Ministry of Health and Sanitation improve childhood vaccination services.*

*Do you have any questions for me before we end the interview?*

- *If YES----- → Answer question(s)*
  - *if you don't know the answer or feel uncomfortable providing an answer, you should feel free to say so...then ask the respondent to visit the nearest health facility to get more information*
- *If NO----- → END*
